# Supplementary material
Source: Research Square preprint supplement (doi:10.21203/rs.3.rs-10389273/v1)
Supplement: Supplementary file 1 [file bc421048d3a1883c8f2faa65.docx]

**Table S1: Inventory of National Food Policy Dossiers**

| **#** | **Country** | **Document Title** | **Publisher / Ministry** | **Year** | **URL** | **Date Accessed** |
| --- | --- | --- | --- | --- | --- | --- |
| 1 | Australia | Australian Dietary Guidelines | NHMRC / Department of Health | 2013 | eatforhealth.gov.au | 13 Jul 2026 |
| 2 | Brazil | Dietary Guidelines for the Brazilian Population | Ministry of Health | 2014 | saude.gov.br/bvs | 13 Jul 2026 |
| 3 | Canada | Canada's Dietary Guidelines | Health Canada | 2019 | canada.ca/en/health-canada/services/canada-food-guide | 13 Jul 2026 |
| 4 | Chile | Norma Técnica No. 230 | Ministerio de Salud (MINSAL) | 2022 | minsal.cl | 13 Jul 2026 |
| 5 | Colombia | Guías Alimentarias Basadas en Alimentos (GABA) para la población colombiana mayor de 2 años | Ministerio de Salud y Protección Social / ICBF | 2015 | minsalud.gov.co | 13 Jul 2026 |
| 6 | Germany | Germany 2024 DGE Recommendations | German Nutrition Society (DGE) | 2024 | dge.de | 13 Jul 2026 |
| 7 | Ghana | National Food-Based Dietary Guidelines | Ministry of Food and Agriculture (MoFA) | 2023 | mofa.gov.gh | 13 Jul 2026 |
| 8 | Guatemala | Guías Alimentarias para Guatemala | Ministerio de Salud Pública y Asistencia Social | 2015 | mspas.gob.gt | 13 Jul 2026 |
| 9 | India | Dietary Guidelines for Indians | National Institute of Nutrition (NIN) / ICMR | 2024 | nin.res.in | 13 Jul 2026 |
| 10 | Japan | Shokuiku Policy Framework | MEXT / MHLW / MAFF | 2016 | maff.go.jp | 13 Jul 2026 |
| 11 | Kenya | National Guidelines for Healthy Diets and Physical Activity | Ministry of Health | 2017 | nutritionhealth.or.ke | 13 Jul 2026 |
| 12 | Mexico | Estrategia Nacional para la Prevención y el Control del Sobrepeso, la Obesidad y la Diabetes | Academia Nacional de Medicina / Secretaría de Salud | 2015 | salud.gob.mx | 13 Jul 2026 |
| 13 | South Africa | Food-Based Dietary Guidelines for South Africa (Revised) | National Department of Health | 2013 | sajcn.co.za | 13 Jul 2026 |
| 14 | UK | The Eatwell Guide | Public Health England | 2016 | gov.uk/government/publications/the-eatwell-guide | 13 Jul 2026 |
| 15 | USA | Dietary Guidelines for Americans, 2020-2025 | USDA / HHS | 2020 | dietaryguidelines.gov | 13 Jul 2026 |
